# Supplementary material
Source: HighWire-hosted journal article supplement (https://jnnp.bmj.com/content/89/1/34)
Supplement: inline-supplementary-material-2 [file inline-supplementary-material-2.pdf]

Appendix 2: Criteria for class of evidence for MS treatments, adapted from EBSJ 2013.<sup>20</sup>

| Class | Bias risk                                                                                                                                                                                       | Study design                                                                                                                          | Criteria                                                                                                                                                                                                                                                                                                                              |
|-------|-------------------------------------------------------------------------------------------------------------------------------------------------------------------------------------------------|---------------------------------------------------------------------------------------------------------------------------------------|---------------------------------------------------------------------------------------------------------------------------------------------------------------------------------------------------------------------------------------------------------------------------------------------------------------------------------------|
| I     | <b>Low risk</b><br>Study adheres to commonly held tenets of high quality design, execution and avoidance bias                                                                                   | Good quality RCT                                                                                                                      | <ul style="list-style-type: none"> <li>• Random sequence generation</li> <li>• Allocation concealment</li> <li>• Blind or independent assessment for important outcomes</li> <li>• Co-interventions applied equally</li> <li>• F/U rate of 80%+</li> <li>• Adequate sample size</li> <li>• Intent-to-treat analysis</li> </ul>        |
| II    | <b>Moderately low risk</b><br>Study has potential for some bias; study does not meet all criteria for class I, but deficiencies not likely to invalidate results or introduce significant bias. | Moderate or poor quality RCT<br><br>Good quality cohort                                                                               | <ul style="list-style-type: none"> <li>• Violation of 1-3 of the criteria for good quality RCT</li> <li>• Blind or independent assessment in prospective study, or use of reliable data in retrospective study</li> <li>• F/U rate of 80%+</li> <li>• Adequate sample size</li> <li>• Controlling for possible confounding</li> </ul> |
| III   | <b>Moderately high risk</b><br>Study has significant flaws in design and/or execution that increase potential for bias that may invalidate study results                                        | Very poor quality RCT (missing 4 or more of the criteria)<br><br>Moderate or poor quality cohort<br><br>Case-control<br><br>Crossover | <ul style="list-style-type: none"> <li>• Violation of 4+ of the criteria for a good quality RCT</li> <li>• Violation of any of the criteria for a good quality cohort</li> <li>• Any case-control design</li> <li>• Any crossover design</li> </ul>                                                                                   |
| IV    | <b>High risk</b><br>Study has significant potential for bias; lack of comparison group precludes direct assessment of important outcomes                                                        | Cross-sectional<br><br>Case series                                                                                                    | <ul style="list-style-type: none"> <li>• Any cross-sectional design</li> <li>• Any case series design</li> </ul>                                                                                                                                                                                                                      |
