# Supplementary material
Source: HighWire-hosted journal article supplement (https://jnnp.bmj.com/content/89/1/34)
Supplement: inline-supplementary-material-5 [file inline-supplementary-material-5.pdf]

**Appendix 5:** Summary table of all studies included in this review.

| CANNABIS                                                            |                     |                    |                         |              |                                 |                                                                                |                                                                                                                                                                                                                       |                   |                                                                                                                                                                    |
|---------------------------------------------------------------------|---------------------|--------------------|-------------------------|--------------|---------------------------------|--------------------------------------------------------------------------------|-----------------------------------------------------------------------------------------------------------------------------------------------------------------------------------------------------------------------|-------------------|--------------------------------------------------------------------------------------------------------------------------------------------------------------------|
| Study                                                               | Citations           | Study type         | Study population        | Control type | Total study population analysed | Primary outcome measures                                                       | Class of evidence criteria                                                                                                                                                                                            | Class of evidence | Main result                                                                                                                                                        |
| Collin et al. 2007<br>[subset of CAMS study in Zajicek et al. 2003] | Collin et al. 2007  | RCT (double-blind) | People with definite MS | Placebo      | 189                             | Respondent reported effect of cannabis; safety and/or tolerability; spasticity | <b>Present:</b> follow-up of ≥80%, random sequence generation, allocation concealment, blind assessment, intention-to-treat analysis; <b>Absent:</b> adequate sample size, equal intervention application (2:1 ratio) | II                | Treatment resulted in a mean 21.5% decrease in Numeric Rating Scale score (spasticity), which was significantly greater than the control.                          |
| Freeman et al. 2006                                                 | Freeman et al. 2006 | RCT (double-blind) | People with MS          | Placebo      | 225                             | Incontinence                                                                   | <b>Present:</b> adequate sample size, follow-up of ≥80%, random sequence generation, allocation concealment, blind assessment, equal intervention application, intention-to-treat analysis; <b>Absent:</b> none       | I                 | Cannabis extract and THC reduced the adjusted incontinence episode rate by 38% and 33%, respectively, both significantly greater than the control (18% reduction). |

|                     |                     |                    |                                                                                                                                                                                                    |         |     |                                  |                                                                                                                                                                                                                                                 |   |                                                                                                                                                                                             |
|---------------------|---------------------|--------------------|----------------------------------------------------------------------------------------------------------------------------------------------------------------------------------------------------|---------|-----|----------------------------------|-------------------------------------------------------------------------------------------------------------------------------------------------------------------------------------------------------------------------------------------------|---|---------------------------------------------------------------------------------------------------------------------------------------------------------------------------------------------|
| Novotna et al. 2011 | Novotna et al. 2011 | RCT (double-blind) | People with MS whose spasticity was not fully relieved with current antispasticity therapy and who achieved 20% or greater improvement in 4 week single-blind Sativex (cannabis extract) treatment | Placebo | 224 | Spasticity                       | <p><b>Present:</b> adequate sample size, follow-up of <math>\geq 80\%</math>, random sequence generation, allocation concealment, blind assessment, equal intervention application, intention-to-treat analysis;</p> <p><b>Absent:</b> none</p> | I | Cannabis extract resulted in a mean 43.6% reduction (improvement) in Numeric Rating Scale score of spasticity, significantly greater than the control.                                      |
| Rog et al. 2005     | Rog et al. 2005     | RCT (double-blind) | People with MS                                                                                                                                                                                     | Placebo | 64  | Pain; safety and/or tolerability | <p><b>Present:</b> adequate sample size, follow-up of <math>\geq 80\%</math>, random sequence generation, allocation concealment, blind assessment, equal intervention application, intention-to-treat analysis;</p> <p><b>Absent:</b> none</p> | I | Cannabis extract resulted in a mean 41.5% reduction in Numeric Rating Scale score of pain and a mean 48.9% reduction in pain-related sleep disturbance, significantly greater than control. |

|                     |                                          |                                         |                                                                                                                                           |         |     |                                                                                     |                                                                                                                                                                                                                      |    |                                                                                                                                                                                                      |
|---------------------|------------------------------------------|-----------------------------------------|-------------------------------------------------------------------------------------------------------------------------------------------|---------|-----|-------------------------------------------------------------------------------------|----------------------------------------------------------------------------------------------------------------------------------------------------------------------------------------------------------------------|----|------------------------------------------------------------------------------------------------------------------------------------------------------------------------------------------------------|
| Wade et al. 2004    | Wade et al. 2004                         | RCT (double-blind)                      | People with MS experiencing significant problems from at least one of the following: spasticity, spasms, bladder problems, tremor or pain | Placebo | 154 | Safety and/or tolerability; visual analogue score (VAS) of most troublesome symptom | <b>Present:</b> adequate sample size, follow-up of $\geq 80\%$ , random sequence generation, allocation concealment, blind assessment, equal intervention application;<br><b>Absent:</b> intention-to-treat analysis | II | Cannabis extract reduced the Visual Analogue Score (VAS) among those with spasticity as their most troublesome symptom (significantly greater than the control), but no effect on the VAS generally. |
| Zajicek et al. 2003 | Zajicek et al. 2003; Zajicek et al. 2005 | RCT (double-blind)                      | People with MS                                                                                                                            | Placebo | 611 | Safety and/or tolerability; spasticity                                              | <b>Present:</b> follow-up of $\geq 80\%$ , random sequence generation, allocation concealment, blind assessment, equal intervention application;<br><b>Absent:</b> adequate sample size, intention-to-treat analysis | II | Cannabis extract and THC had no effect on Ashworth scale score (spasticity), but some effect on patient perception of symptom.                                                                       |
| Zajicek et al. 2012 | Zajicek et al. 2012                      | phase III clinical trial (double-blind) | People with MS                                                                                                                            | Placebo | 279 | Muscle stiffness                                                                    | <b>Present:</b> follow-up of $\geq 80\%$ , random sequence generation, allocation concealment, blind assessment, equal intervention application;<br><b>Absent:</b> adequate sample size, intention-to-treat analysis | II | Cannabis had positive effect on the patient-reported category rating scale score for muscle stiffness, significantly greater than for the control.                                                   |

## DIET

| Study                | Citations            | Study type         | Study population | Control type | Total study population analysed | Primary outcome measures                                                         | Class of evidence criteria                                                                                                                                                                                                 | Class of evidence | Main result                                                                                                                                                                                                                                                                                                                |
|----------------------|----------------------|--------------------|------------------|--------------|---------------------------------|----------------------------------------------------------------------------------|----------------------------------------------------------------------------------------------------------------------------------------------------------------------------------------------------------------------------|-------------------|----------------------------------------------------------------------------------------------------------------------------------------------------------------------------------------------------------------------------------------------------------------------------------------------------------------------------|
| Lovera et al. 2012   | Lovera et al. 2012   | RCT (double-blind) | People with MS   | Placebo      | 116                             | MRI and/or cognitive function metrics; safety and/or tolerability                | <b>Present:</b> adequate sample size, follow-up of $\geq 80\%$ , random sequence generation, allocation concealment, blind assessment, equal intervention application, intention-to-treat analysis;<br><b>Absent:</b> none | I                 | <i>Ginkgo biloba</i> had no effect on cognitive performance.                                                                                                                                                                                                                                                               |
| Mosayebi et al. 2011 | Mosayebi et al. 2011 | RCT (double-blind) | People with MS   | Placebo      | 59                              | Immune markers; MRI and/or cognitive function metrics; relapse and/or disability | <b>Present:</b> follow-up of $\geq 80\%$ , random sequence generation, allocation concealment, blind assessment, equal intervention application;<br><b>Absent:</b> adequate sample size, intention-to-treat analysis       | II                | Vitamin D supplementation had no effect on gadolinium-enhancing MRI lesions or disability. However, at the 6 month follow-up, treated patients had significantly lower cell proliferation and higher levels of transforming growth factor (79.3%) and interleukin-10 (37.5%), significantly better than the control group. |

|                               |                                                                                                                          |                    |                                                    |                     |    |                                                                                              |                                                                                                                                                                                                           |    |                                                                                                                                                                                                                                                                                                                                                                   |
|-------------------------------|--------------------------------------------------------------------------------------------------------------------------|--------------------|----------------------------------------------------|---------------------|----|----------------------------------------------------------------------------------------------|-----------------------------------------------------------------------------------------------------------------------------------------------------------------------------------------------------------|----|-------------------------------------------------------------------------------------------------------------------------------------------------------------------------------------------------------------------------------------------------------------------------------------------------------------------------------------------------------------------|
| Rezapour-Firouzi et al. 2013a | Rezapour-Firouzi et al. 2013a; Rezapour-Firouzi et al. 2013b; Rezapour-Firouzi et al. 2014; Rezapour-Firouzi et al. 2015 | RCT (double-blind) | People with RRMS patients with EDSS<6              | Placebo (olive oil) | 65 | Immune markers; relapse and/or disability                                                    | <b>Present:</b> random sequence generation, allocation concealment, blind assessment, equal intervention application; <b>Absent:</b> adequate sample size, follow-up of ≥80%, intention-to-treat analysis | II | PUFA-rich oil supplementation, with and without a Hot-natured diet, significantly reduced EDSS by a mean of 35.9% and 43.7% and reduced relapse rate by a mean of 87.1% and 88.4%, respectively, over 6 months. However, while EDSS increased by a mean of 11.9% in the control group, there are no statistical comparisons between control and treatment groups. |
| Soilu-Hänninen et al. 2012    | Soilu-Hänninen et al. 2012                                                                                               | RCT (double-blind) | 66 MS patients; 32 in vitamin D intervention group | Placebo             | 62 | MRI and/or cognitive function metrics; relapse and/or disability; safety and/or tolerability | <b>Present:</b> follow-up of ≥80%, random sequence generation, allocation concealment, blind assessment, equal intervention application; <b>Absent:</b> adequate sample size, intention-to-treat analysis | II | Vitamin D3 supplementation as an add-on treatment to interferon beta reduced the number of T1 gadolinium-enhancing MRI lesions by 83.3%, a significantly greater reduction than the control, but had no effect on burden of disease or disability accumulation.                                                                                                   |

|                        |                                                                |                                   |                                          |                                                                                        |     |                                                                                                       |                                                                                                                                                                                                           |    |                                                                                                                                                                     |
|------------------------|----------------------------------------------------------------|-----------------------------------|------------------------------------------|----------------------------------------------------------------------------------------|-----|-------------------------------------------------------------------------------------------------------|-----------------------------------------------------------------------------------------------------------------------------------------------------------------------------------------------------------|----|---------------------------------------------------------------------------------------------------------------------------------------------------------------------|
| Steffensen et al. 2011 | Steffensen et al. 2011; Kampman et al. 2012; Rosjo et al. 2015 | phase II trial (double-blind RCT) | Fully ambulatory people with MS patients | Placebo (calcium tablet)                                                               | 68  | Bone mineral density; fatigue, depression and/or QoL; inflammation markers; relapse and/or disability | <b>Present:</b> follow-up of ≥80%, random sequence generation, allocation concealment, blind assessment, equal intervention application, intention-to-treat analysis; <b>Absent:</b> adequate sample size | II | Vitamin D3 supplementation did not prevent bone loss or effect clinical outcomes, including inflammation markers, fatigue and depression.                           |
| Torkildsen et al. 2012 | Torkildsen et al. 2012                                         | RCT (double-blind)                | People with MS                           | Placebo                                                                                | 92  | MRI and/or cognitive function metrics                                                                 | <b>Present:</b> adequate sample size, follow-up of ≥80%, random sequence generation, allocation concealment, blind assessment, equal intervention application; <b>Absent:</b> intention-to-treat analysis | II | No effect of omega-3 supplementation on gadolinium-enhancing MRI lesions or secondary outcomes.                                                                     |
| Tourbah et al. 2016    | Tourbah et al. 2016                                            | RCT (double-blind)                | People with progressive MS               | 51 completed RCT, 42 completed long-term follow-up where they were treated with biotin | 154 | Relapse and/or disability                                                                             | <b>Present:</b> adequate sample size, follow-up of ≥80%, random sequence generation, allocation concealment, blind assessment, intention-to-treat analysis; <b>Absent:</b> equal intervention application | II | High dose biotin resulted in disability reversal at month 9, confirmed at month 12, in 12.6% of treated patients, significantly more than the control (0 patients). |

## EXERCISE

| Study               | Citations                               | Study type         | Study population | Control type                                                     | Total study population analysed | Primary outcome measures                                              | Class of evidence criteria                                                                                                                                                                                | Class of evidence | Main result                                                                                                                                                                                     |
|---------------------|-----------------------------------------|--------------------|------------------|------------------------------------------------------------------|---------------------------------|-----------------------------------------------------------------------|-----------------------------------------------------------------------------------------------------------------------------------------------------------------------------------------------------------|-------------------|-------------------------------------------------------------------------------------------------------------------------------------------------------------------------------------------------|
| Bansi et al. 2012   | Bansi et al. 2012;<br>Bansi et al. 2013 | RCT (single-blind) | People with MS   | Compared aquatic and land-based exercises                        | 52                              | Endurance improvement; fatigue, depression and/or QoL; immune markers | <b>Present:</b> follow-up of ≥80%, random sequence generation, blind assessment, equal intervention application; <b>Absent:</b> adequate sample size, allocation concealment, intention-to-treat analysis | II                | No significant differences in cytokines and neurotrophins between exercise treatments. Cardiovascular metrics improved in both groups, but there was no significant difference between the two. |
| Collett et al. 2010 | Collett et al. 2010                     | RCT (single-blind) | People with MS   | Compared continuous, intermittent, and combined exercise regimes | 55                              | Gait speed                                                            | <b>Present:</b> adequate sample size, follow-up of ≥80%, random sequence generation, blind assessment, equal intervention application, intention-to-treat analysis; <b>Absent:</b> allocation concealment | II                | Exercise improved walking speed (effect size = 0.25), but its effect did not vary between intensity treatments.                                                                                 |

|                      |                      |                    |                                                                              |                             |     |                                                              |                                                                                                                                                                                                           |    |                                                                                                                                                                                                                                   |
|----------------------|----------------------|--------------------|------------------------------------------------------------------------------|-----------------------------|-----|--------------------------------------------------------------|-----------------------------------------------------------------------------------------------------------------------------------------------------------------------------------------------------------|----|-----------------------------------------------------------------------------------------------------------------------------------------------------------------------------------------------------------------------------------|
| Dodd et al. 2011     | Dodd et al. 2011     | RCT (single-blind) | People with RRMS                                                             | Usual care                  | 67  | Endurance improvement; gait speed                            | <b>Present:</b> follow-up of ≥80%, random sequence generation, blind assessment, equal intervention application, intention-to-treat analysis; <b>Absent:</b> adequate sample size, allocation concealment | II | No effect of progressive resistance training (PRT) on the primary outcome of walking performance. However, PRT improved several secondary outcomes, but this effect was not maintained at the 22-week follow-up.                  |
| Gandolfi et al. 2015 | Gandolfi et al. 2015 | RCT (single-blind) | People with MS (EDSS: 1.5– 6.0) and subjective symptoms of balance disorders | Conventional rehabilitation | 80  | Balance                                                      | <b>Present:</b> follow-up of ≥80%, random sequence generation, blind assessment, equal intervention application, intention-to-treat analysis; <b>Absent:</b> adequate sample size, allocation concealment | II | Sensory integration balance training improved balance by 10% (Berg Balance Scale), significantly more than the control. Also reduced secondary outcome of fatigue by 14.6% (FSS).                                                 |
| Garrett et al. 2012  | Garrett et al. 2012  | RCT (single-blind) | People with MS                                                               | No intervention             | 291 | Functional impairment; MRI and/or cognitive function metrics | <b>Present:</b> follow-up of ≥80%, random sequence generation, blind assessment, equal intervention application; <b>Absent:</b> adequate sample size, allocation concealment, intention-to-treat analysis | II | Group physical therapist-led and fitness-instructor led exercise programs improved the MS Impact Scale physical component significantly compared to the control. Yoga did not. All interventions improved the secondary outcomes, |



except that yoga did not improve the 6 MWT.

|                       |                       |                    |                |                 |    |                                       |                                                                                                                                                                                                                   |    |                                                                                 |
|-----------------------|-----------------------|--------------------|----------------|-----------------|----|---------------------------------------|-------------------------------------------------------------------------------------------------------------------------------------------------------------------------------------------------------------------|----|---------------------------------------------------------------------------------|
| Nilsagard et al. 2012 | Nilsagard et al. 2012 | RCT (single-blind) | People with MS | No intervention | 80 | Timed Up and Go test (TUG)            | <b>Present:</b> follow-up of $\geq 80\%$ , random sequence generation, blind assessment, equal intervention application; <b>Absent:</b> adequate sample size, allocation concealment, intention-to-treat analysis | II | Nintendo Wii Fit® balance training had no effect on walking ability or balance. |
| Oken et al. 2004      | Oken et al. 2004      | RCT (single-blind) | People with MS | Waitlist        | 57 | MRI and/or cognitive function metrics | <b>Present:</b> follow-up of $\geq 80\%$ , random sequence generation, blind assessment, equal intervention application, intention-to-treat analysis; <b>Absent:</b> adequate sample size, allocation concealment | II | Neither aerobic exercise nor yoga had an effect on alertness or attention.      |

|                     |                                          |                    |                                                 |                              |    |                                                                                              |                                                                                                                                                                                                              |    |                                                                                                                                                                                                             |
|---------------------|------------------------------------------|--------------------|-------------------------------------------------|------------------------------|----|----------------------------------------------------------------------------------------------|--------------------------------------------------------------------------------------------------------------------------------------------------------------------------------------------------------------|----|-------------------------------------------------------------------------------------------------------------------------------------------------------------------------------------------------------------|
| Romberg et al. 2004 | Romberg et al. 2004; Romberg et al. 2005 | RCT (not blinded)  | People with MS with mild to moderate disability | No intervention              | 91 | Fatigue, depression and/or QoL; functional impairment; gait speed; relapse and/or disability | <b>Present:</b> follow-up of ≥80%, random sequence generation, equal intervention application, intention-to-treat analysis;<br><b>Absent:</b> adequate sample size, allocation concealment, blind assessment | II | A 6-month exercise program improved walking speed by 11.6%, significantly more than the control. However, it had no effect on HR-QoL.                                                                       |
| Straudi et al. 2016 | Straudi et al. 2016                      | RCT (single-blind) | People with MS (EDSS 6.0–7.0)                   | Conventional walking therapy | 52 | Endurance improvement; gait speed                                                            | <b>Present:</b> adequate sample size, follow-up of ≥80%, random sequence generation, blind assessment, equal intervention application, intention-to-treat analysis;<br><b>Absent:</b> allocation concealment | II | Robot-assisted gait training significantly improved walking endurance and balance compared to control. Effect size could not be determined.                                                                 |
| Tarakci et al. 2013 | Tarakci et al. 2013                      | RCT (single-blind) | Ambulatory people with MS                       | No intervention              | 99 | Balance; gait speed                                                                          | <b>Present:</b> adequate sample size, follow-up of ≥80%, random sequence generation, blind assessment, equal intervention application, intention-to-treat analysis;<br><b>Absent:</b> allocation concealment | II | Supervised group exercise training improved balance by 11.5% (Berg Balance Score) and walking speed by 15.2% and 20.6% (10 MWT and 10 SCT). It also improves the secondary outcome of fatigue by 21% (FSS). |

PSYCHOLOGICAL APPROACHES

| Study                | Citations            | Study type         | Study population                      | Control type | Total study population analysed | Primary outcome measures                                                                               | Class of evidence criteria                                                                                                                                                                                              | Class of evidence | Main result                                                                                                                                                                                                                                                                              |
|----------------------|----------------------|--------------------|---------------------------------------|--------------|---------------------------------|--------------------------------------------------------------------------------------------------------|-------------------------------------------------------------------------------------------------------------------------------------------------------------------------------------------------------------------------|-------------------|------------------------------------------------------------------------------------------------------------------------------------------------------------------------------------------------------------------------------------------------------------------------------------------|
| Grossman et al. 2010 | Grossman et al. 2010 | RCT (not blind)    | People with MS                        | Usual care   | 150                             | Fatigue, depression and/or QoL                                                                         | <p><b>Present:</b> adequate sample size, follow-up of ≥80%, random sequence generation, equal intervention application, intention-to-treat analysis;</p> <p><b>Absent:</b> allocation concealment, blind assessment</p> | II                | Mindfulness treatment improved disease aspecific HR-QoL (PQOLC, effect size =0.51), disease specific HR-QoL (HAQUAMS, effect size = 0.28), depression (CES-D, effect size = 0.36), and fatigue (MFIS, effect size = 0.38). All improvements were significantly greater than the control. |
| Lincoln et al. 2011  | Lincoln et al. 2011  | RCT (single-blind) | People with MS patients with low mood | Waitlist     | 127                             | Anxiety, distress and/or stress; fatigue, depression and/or QoL; MS Impact Scale (MSIS)- Psychological | <p><b>Present:</b> follow-up of ≥80%, random sequence generation, equal intervention application, intention-to-treat analysis;</p> <p><b>Absent:</b> adequate sample size, allocation concealment</p>                   | II                | CBT improved general health score (General Health Questionnaire 12) by 5.5% , reduced depression by 5.8% (Beck Depression Inventory) and 7.9% (HADS), and reduced anxiety by a mean of 9.8% (HADS). These effects were significant compared to the control.                              |

|                  |                                                                                               |                    |                                |                                                                     |     |                                                                                                                              |                                                                                                                                                                                                              |    |                                                                                                                                                                                                                                                                                   |
|------------------|-----------------------------------------------------------------------------------------------|--------------------|--------------------------------|---------------------------------------------------------------------|-----|------------------------------------------------------------------------------------------------------------------------------|--------------------------------------------------------------------------------------------------------------------------------------------------------------------------------------------------------------|----|-----------------------------------------------------------------------------------------------------------------------------------------------------------------------------------------------------------------------------------------------------------------------------------|
| Mohr et al. 2001 | Mohr et al. 2001; Mohr et al. 2003; Mohr et al. 2004                                          | RCT (not blind)    | People with MS                 | sertraline (antidepressant) and supportive-expressive therapy (SEG) | 52  | Fatigue, depression and/or QoL; social support                                                                               | <b>Present:</b> follow-up of ≥80%, random sequence generation, equal intervention application, intention-to-treat analysis;<br><b>Absent:</b> adequate sample size, allocation concealment                   | II | CBT and sertraline were more effective than SEG at reducing depression. Treatments for depression lead to reductions in fatigue (CBT reduced Fatigue Assessment Instrument score by 6.5%), likely due to change in mood, and treatment for depression increased sense of support. |
| Mohr et al. 2005 | Mohr et al. 2005; Hart et al. 2008; Beckner et al. 2010; Cosio et al. 2011; Baron et al. 2011 | RCT (single-blind) | People with MS                 | Supportive emotion focused therapy                                  | 127 | Affect, benefit-finding and/or optimism; fatigue, depression and/or QoL; insomnia; relapse and/or disability; social support | <b>Present:</b> follow-up of ≥80%, random sequence generation, blind assessment, equal intervention application;<br><b>Absent:</b> adequate sample size, allocation concealment, intention-to-treat analysis | II | CBT improved QoL compared to control. Both treatments reduced insomnia by improving depression, but there was no statistical difference between the two. Effect sizes could not be calculated.                                                                                    |
| Mohr et al. 2007 | Mohr et al. 2007; Blackmore et al. 2011                                                       | RCT (single-blind) | People with MS with depression | Supportive emotion focused therapy                                  | 127 | Anxiety, distress and/or stress; functional impairment                                                                       | <b>Present:</b> follow-up of ≥80%, random sequence generation, blind assessment,                                                                                                                             | II | Both treatments significantly improved disability and fatigue, but CBT was significantly more effective. Effect sizes                                                                                                                                                             |

|                         |                         |                    |                                                        |                      |    |                                                           |                                                                                                                                                                                                                                                                                                                                                                                                                                                                                                                                           |    |                                                                                                                                                                                                                                                                                                                                                                                              |
|-------------------------|-------------------------|--------------------|--------------------------------------------------------|----------------------|----|-----------------------------------------------------------|-------------------------------------------------------------------------------------------------------------------------------------------------------------------------------------------------------------------------------------------------------------------------------------------------------------------------------------------------------------------------------------------------------------------------------------------------------------------------------------------------------------------------------------------|----|----------------------------------------------------------------------------------------------------------------------------------------------------------------------------------------------------------------------------------------------------------------------------------------------------------------------------------------------------------------------------------------------|
| Moss-Morris et al. 2013 | Moss-Morris et al. 2013 | RCT (single-blind) | Ambulatory people with MS within 10 years of diagnosis | Supportive listening | 94 | Fatigue, depression and/or QoL; relapse and/or disability | <p>equal intervention application, intention-to-treat analysis;</p> <p><b>Absent:</b> adequate sample size, allocation concealment</p> <p><b>Present:</b> adequate sample size, follow-up of ≥80%, random sequence generation, blind assessment, equal intervention application, intention-to-treat analysis;</p> <p><b>Absent:</b> allocation concealment</p> <p><b>Present:</b> follow-up of ≥80%, random sequence generation, blind assessment, equal intervention application, intention-to-treat analysis;</p> <p><b>Absent:</b></p> | II | <p>could not be calculated.</p> <p>CBT reduced distress by 19.2% 12 months after treatment (GHQ-12), but had no effect on functional impairment (WSAS).</p> <p>Both treatment and control improved cognitive function as measured by the Minimal Assessment of Cognitive Function in MS. The treatment did show significantly greater improvement in the use of compensatory strategies.</p> |
| Stuifbergen et al. 2012 | Stuifbergen et al. 2012 | RCT (single-blind) | People with MS                                         | Waitlist             | 61 | MRI and/or cognitive function metrics                     | <p>equal intervention application, intention-to-treat analysis;</p> <p><b>Absent:</b> adequate sample size, allocation concealment</p> <p><b>Present:</b> adequate sample size, follow-up of ≥80%, random sequence generation, blind assessment, equal intervention application, intention-to-treat analysis;</p> <p><b>Absent:</b> allocation concealment</p> <p><b>Present:</b> follow-up of ≥80%, random sequence generation, blind assessment, equal intervention application, intention-to-treat analysis;</p> <p><b>Absent:</b></p> | II | <p>could not be calculated.</p> <p>CBT reduced distress by 19.2% 12 months after treatment (GHQ-12), but had no effect on functional impairment (WSAS).</p> <p>Both treatment and control improved cognitive function as measured by the Minimal Assessment of Cognitive Function in MS. The treatment did show significantly greater improvement in the use of compensatory strategies.</p> |

|                    |                                                            |                    |                |                        |     |                                                                         |                                                                                                                                                                                                                         |    |                                                                                                                                                                                                                                                                                    |
|--------------------|------------------------------------------------------------|--------------------|----------------|------------------------|-----|-------------------------------------------------------------------------|-------------------------------------------------------------------------------------------------------------------------------------------------------------------------------------------------------------------------|----|------------------------------------------------------------------------------------------------------------------------------------------------------------------------------------------------------------------------------------------------------------------------------------|
|                    |                                                            |                    |                |                        |     |                                                                         | adequate sample size, allocation concealment                                                                                                                                                                            |    |                                                                                                                                                                                                                                                                                    |
| Thomas et al. 2013 | Thomas et al. 2013; Thomas et al. 2014; Thomas et al. 2015 | RCT (single-blind) | People with MS | Current local practice | 146 | Fatigue, depression and/or QoL                                          | <p><b>Present:</b> follow-up of ≥80%, random sequence generation, blind assessment, equal intervention application;</p> <p><b>Absent:</b> adequate sample size, allocation concealment, intention-to-treat analysis</p> | II | CBT-based fatigue management program reduced fatigue severity and self-efficacy at 4 months follow-up (standardized effect sizes (SES) of -0.35 and 0.36, respectively) and 1 year follow-up (SES of -0.29 and 0.34, respectively). Significantly more effective than the control. |
| van Kessel 2008    | van Kessel 2008; Knoop et al. 2012                         | RCT (not blind)    | People with MS | Relaxation training    | 70  | Affect, benefit-finding and/or optimism; fatigue, depression and/or QoL | <p><b>Present:</b> adequate sample size, follow-up of ≥80%, random sequence generation, equal intervention application, intention-to-treat analysis;</p> <p><b>Absent:</b> allocation</p>                               | II | Both are clinically effective treatments for fatigue in MS patients, although the effects for CBT are greater than those for the control (effect size of 3.03 for the treatment group and 1.83 for the control group).                                                             |

concealment,  
blind assessment

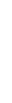

## OTHER CAM

| Study                | Citations              | Study type         | Study population | Control type                     | Total study population analysed | Primary outcome measures                                        | Class of evidence criteria                                                                                                                                                                                                           | Class of evidence | Main result                                                                                                                                                                                                  |
|----------------------|------------------------|--------------------|------------------|----------------------------------|---------------------------------|-----------------------------------------------------------------|--------------------------------------------------------------------------------------------------------------------------------------------------------------------------------------------------------------------------------------|-------------------|--------------------------------------------------------------------------------------------------------------------------------------------------------------------------------------------------------------|
| Artemios et al. 2012 | Artemiadis et al. 2012 | RCT (single-blind) | People with RRMS | No intervention                  | 61                              | Anxiety, distress and/or stress; fatigue, depression and/or QoL | <b>Present:</b> adequate sample size, follow-up of ≥80%, random sequence generation, blind assessment, equal intervention application;<br><b>Absent:</b> allocation concealment, intention-to-treat analysis                         | II                | Relaxation-based stress management program significantly reduced stress (Perceived Stress Scale, effect size = 0.62) and depression (Beck Depression Inventory, effect size = 0.53) compared to the control. |
| Bastani et al. 2015  | Bastani et al. 2015    | RCT (not blind)    | Women with MS    | Sham (touching, but no pressure) | 100                             | Fatigue, depression and/or QoL                                  | <b>Present:</b> adequate sample size, follow-up of ≥80%, random sequence generation, allocation concealment, equal intervention application;<br><b>Absent:</b> allocation concealment, blind assessment, intention-to-treat analysis | II                | Acupressure reduced fatigue score by 26% (measured with the Fatigue Severity Scale).                                                                                                                         |
| Hughes et al. 2009   | Hughes et al. 2009     | RCT (single-blind) | People with MS   | Sham reflexology                 | 73                              | Pain                                                            | <b>Present:</b> adequate sample size, follow-up of ≥80%, random sequence generation, blind assessment, equal intervention application;<br><b>Absent:</b> allocation                                                                  | II                | Both treatment and sham caused a significant reduction in pain that persisted to the 12-week follow-up. No significant difference between                                                                    |



|                    |                    |                    |                                                                                                                                                      |                            |    |                                       |                                                                                                                                                                                                               |                                                                                                                                                                                                                                                                                                                                                         |
|--------------------|--------------------|--------------------|------------------------------------------------------------------------------------------------------------------------------------------------------|----------------------------|----|---------------------------------------|---------------------------------------------------------------------------------------------------------------------------------------------------------------------------------------------------------------|---------------------------------------------------------------------------------------------------------------------------------------------------------------------------------------------------------------------------------------------------------------------------------------------------------------------------------------------------------|
|                    |                    |                    |                                                                                                                                                      |                            |    |                                       | concealment, intention-to-treat analysis                                                                                                                                                                      | treatment and sham effect.                                                                                                                                                                                                                                                                                                                              |
| Morrow et al. 2015 | Morrow et al. 2015 | RCT (double-blind) | People with MS demonstrating PS impairment on either the Symbol Digit Modalities Test (SDMT) or Paced Auditory Serial Addition Test (PASAT) XR(n=20) | Placebo                    | 52 | MRI and/or cognitive function metrics | <b>Present:</b> follow-up of ≥80%, random sequence generation, allocation concealment, blind assessment, equal intervention application;<br><b>Absent:</b> adequate sample size, intention-to-treat analysis  | II<br>Improving processing speed                                                                                                                                                                                                                                                                                                                        |
| Nazari et al. 2016 | Nazari et al. 2016 | RCT (single-blind) | Women with MS                                                                                                                                        | Usual care, and relaxation | 75 | Pain                                  | <b>Present:</b> follow-up of ≥80%, random sequence generation, blind assessment, equal intervention application;<br><b>Absent:</b> adequate, sample size, allocation concealment, intention-to-treat analysis | II<br>Both relaxation and reflexology improve pain immediately after treatment (reduce Numerical Rating Scale score by 11.8% and 44.8%, respectively), but reflexology causes a greater reduction in pain than relaxation. However, neither caused a long-term effect (there was no difference between treatment and control at the 2-month follow-up). |
