# Supplementary material
Source: HighWire-hosted journal article supplement (https://jnnp.bmj.com/content/89/1/34)
Supplement: inline-supplementary-material-6 [file inline-supplementary-material-6.pdf]

*Appendix 6:* Other CAM commonly used by people with MS (> 2% of survey respondents report using) that were not included in this review. Information derived from Stoll et al. (2012)<sup>2</sup> and Skovgaard et al. (2013)<sup>3</sup>.

Acupuncture<sup>2</sup>

Amalgam removal<sup>3</sup>

Cranio-sacral therapy<sup>3</sup>

Herbal medicine<sup>3</sup>

Homeopathy<sup>3</sup>

Massage therapy<sup>2</sup>

Osteopathic manipulative treatment (OMT)<sup>2</sup>

Other dietary supplements<sup>3</sup>:

Antioxidant

Alcalic

Amino acid

Colloid silver

Enzymes

Fibre

Glucosamine

Low dose naltrexone (LDN)

Mitochondrial Energy Optimizer

Probiotics

Protein

Royal Jelly

Super food
